# Supplementary material for: Channel-independent function of UNC-9/Innexin in spatial arrangement of GABAergic synapses in C. elegans
Source: eLife. 2022 Nov 15;11:e80555. doi: 10.7554/eLife.80555 (PMC9665852; doi:10.7554/eLife.80555)
Supplement: Figure 1—figure supplement 1—source data 1. [file elife-80555-fig1-figsupp1-data1.xlsx]

## Sheet: Sheet1
wild type	egl-20(n585)
4.293	24.647
0.903	25.169
5.773	24.853
0	19.172
0	18.624
7.159	27.103
7.029	18.769
10.418	19.853
4.139	39.331
2.758	16.78
7.941	50.09
0	41.942
3.349	15.753
10.023	15.071
0	25.913
0	46.506
5.617	61.766
2.281	15.868
3.066	28.265
3.644	27.977
3.051	28.647
2.701	35.048
0	16.706
1.992	16.868
3.645	19.546
3.29	16.972
6.35
4.221
6.168
4.789
