# Supplementary material for: Channel-independent function of UNC-9/Innexin in spatial arrangement of GABAergic synapses in C. elegans
Source: eLife. 2022 Nov 15;11:e80555. doi: 10.7554/eLife.80555 (PMC9665852; doi:10.7554/eLife.80555)
Supplement: Figure 1—figure supplement 1—source data 2. [file elife-80555-fig1-figsupp1-data2.xlsx]

## Sheet: Sheet1
wild type	egl-20(n585)
0	15.916
2.006	18.944
0	0
0.694	24.6
2.011	22.302
3.454	56.405
1.719	68.165
10.783	27.329
3.397	15.22
1.684	18.879
3.635	22.898
0	32.071
7.432	17.03
2.223	18.996
0	9.97
3.169	20.205
3.239	36.606
4.945	54.031
0	40.333
10.057	41.157
5.405	46.616
0	10.698
4.69	16.74
0	22.668
4.933	18.066
0
5.302
9.668
5.618
