# Supplementary material for: Channel-independent function of UNC-9/Innexin in spatial arrangement of GABAergic synapses in C. elegans
Source: eLife. 2022 Nov 15;11:e80555. doi: 10.7554/eLife.80555 (PMC9665852; doi:10.7554/eLife.80555)
Supplement: Figure 1—figure supplement 2—source data 2. [file elife-80555-fig1-figsupp2-data2.xlsx]

## Sheet: wyIs486
wild type	egl-20(n585)	egl-20(n585); Ex[Pegl-20::egl-20]	unc-9(e101)	egl-20(n585); unc-9(e101)
113.473	85.573	94.983	113.976	74.782
117.737	60.179	92.703	124.012	84.654
104.071	99.458	102.729	124.109	60.065
104.3	100.388	104.998	126.373	83.44
114.364	101.544	105.615	118.578	93.82
108.181	105.899	95.669	131.079	116.637
114.361	92.921	110.185	112.126	77.643
105.499	103.911	106.658	128.306	79.226
105.426	107.03	101.402	126.306	109.843
101.51	71.746	104.705	127.19	97.513
104.382	80.197	131.906	137.038	100.501
108.815	92.324	109.148	127.58	90.57
110.691	95.939	77.971	123.039	83.204
117.971	131.539	108.926	125.489	68.822
115.409	99.315	104.975	134.046	87.605
101.194	72.522	111.675	131.671	82.109
116.192	100.165	91.785	107.756	95.428
112.517	91.355	116.337	133.547	88.179
96.037	117.544	103.083	128.54	89.623
103.122	89.893	126.889		79.39
108.002	108.317	109.781		80.236
99.723	97.472	96.833		71.357
111.885	91.559	90.428		77.45
110.197	95.261	99.24		118.963
107.516	78.334	89.58		82.127
96.534	114.595	109.152		83.541
104.789		85.039
97.973		110.676
125.161		89.032
113.319		85.702
