# Supplementary material for: Channel-independent function of UNC-9/Innexin in spatial arrangement of GABAergic synapses in C. elegans
Source: eLife. 2022 Nov 15;11:e80555. doi: 10.7554/eLife.80555 (PMC9665852; doi:10.7554/eLife.80555)
Supplement: Figure 1—figure supplement 2—source data 3. [file elife-80555-fig1-figsupp2-data3.xlsx]

## Sheet: wyIs486
wild type	egl-20(n585)	egl-20(n585); Ex[Pegl-20::egl-20]	unc-9(e101)	egl-20(n585); unc-9(e101)
8.074	35.548	18.1	6.613	54.979
7.595	61.704	14.73	0.957	47.474
11.115	30.384	19.614	7.243	70.95
9.651	24.997	16.565	4.271	46.776
5.303	31.131	7.726	21.439	41.605
5.181	5.322	14.094	0	12.191
15.575	35.04	15.796	5.2	48.601
4.845	37.43	25.496	10.787	42.004
10.577	9.085	6.723	11.804	46.6
8.503	43.156	14.744	11.336	44.455
7.021	42.396	16.287	9.924	82.094
7.354	79.437	7.911	6.84	44.766
12.746	43.615	27.521	0	22.485
9.825	62.802	21.529	14.054	69.434
6.612	36.664	35.528	7.278	26.982
6.412	81.29	11.508	6.058	22.483
7.04	55.496	11.758	15.759	30.3
4.405	13.509	3.187	18.396	32.977
1.899	41.58	13.356	11.237	24.14
9.664	46.415	16.416	10.444	20.267
8.083	46.037	0	11.85	36.212
12.423	15.899	9.708	3.113	3.087
2.554	30.191	7.692		25.597
11.186	54.898	17.381		19.333
13.91	56.662	16.92		28.852
12.102	39.009	5.176
9.637	19.87	5.415
7.437		9.09
11.588		26.498
5.98		12.101
