# Supplementary material for: Channel-independent function of UNC-9/Innexin in spatial arrangement of GABAergic synapses in C. elegans
Source: eLife. 2022 Nov 15;11:e80555. doi: 10.7554/eLife.80555 (PMC9665852; doi:10.7554/eLife.80555)
Supplement: Figure 1—figure supplement 2—source data 4. [file elife-80555-fig1-figsupp2-data4.xlsx]

## Sheet: Sheet1
wild type	egl-20(n585)	egl-20(n585); Ex[Pegl-20::egl-20]	unc-9(e101)	egl-20(n585); unc-9(e101)
4.293	24.647	0	10.88	14.326
0.903	25.169	17.968	1.44	6.649
5.773	24.853	11.352	10.619	28.269
0	19.172	11.226	3.358	31.608
0	18.624	24.719	10.353	25.409
7.159	27.103	16.335	4.12	16.131
7.029	18.769	21.245	8.257	41.999
10.418	19.853	16.515	5.322	26.033
4.139	39.331	0	7.295	29.959
2.758	16.78	12.383	10.843	20.087
7.941	50.09	19.157	11.291	20.084
0	41.942	5.315	14.559	5.514
3.349	15.753	29.06	7.441	23.104
10.023	15.071	4.955	3.048	14.294
0	25.913	7.847	0	17.035
0	46.506	7.726	7.749	23
5.617	61.766	20.432	14.142	58.341
2.281	15.868	21.093	4.473	25.884
3.066	28.265	29.952	2.152	43.56
3.644	27.977	15.638	11.155	11.821
3.051	28.647	9.464	13.498	19.849
2.701	35.048	7.128	2.655	30.931
0	16.706	0		16.288
1.992	16.868	18.986
3.645	19.546	7.148
3.29	16.972	3.943
6.35		3.882
4.221		11.033
6.168		11.98
4.789		14.709
