# Supplementary material for: Channel-independent function of UNC-9/Innexin in spatial arrangement of GABAergic synapses in C. elegans
Source: eLife. 2022 Nov 15;11:e80555. doi: 10.7554/eLife.80555 (PMC9665852; doi:10.7554/eLife.80555)
Supplement: Figure 1—source data 1. [file elife-80555-fig1-data1.xlsx]

## Sheet: Sheet1
wild type	egl-20(n585)
8.796	97.095
8.426	17.987
15.474	28.525
16.763	32.076
7.836	4.809
10.412	42.346
12.337	22.965
13.625	63.987
8.083	88.188
6.877	51.765
12.451	82.126
6.029	21.079
4.55	12.509
1.292	9.085
11.329	8.209
4.284	31.445
9.276	44.743
2.083	55.156
9.161	33.286
17.589	30.384
11.115	63.395
5.319	43.122
5.303	30.03
4.258	14.299
2.405	23.664
4.409	29.951
5.442
12.62
6.813
10.335
