# Supplementary material for: Channel-independent function of UNC-9/Innexin in spatial arrangement of GABAergic synapses in C. elegans
Source: eLife. 2022 Nov 15;11:e80555. doi: 10.7554/eLife.80555 (PMC9665852; doi:10.7554/eLife.80555)
Supplement: Figure 1—source data 2. [file elife-80555-fig1-data2.xlsx]

## Sheet: Sheet1
wild type	egl-20(n585)
2.101	8.821
0	8.161
0.407	8.346
1.932	8.766
0	15.924
0	6.619
1.755	0
3.675	3.781
0	14.685
6.742	3.152
7.058	0
2.782	7.151
0	13.5
3.023	7.013
1.328	4.151
0	12.02
5.045	7.862
0	0
0	0
8.299	0
0	1.878
3.184	0
2.744	0
2.314	0.904
0	0
1.314	2.025
0	15.746
1.628	4.008
	17.504
	3.272
	6.203
	5.844
	0
	2.101
	4.527
