# Supplementary material for: Channel-independent function of UNC-9/Innexin in spatial arrangement of GABAergic synapses in C. elegans
Source: eLife. 2022 Nov 15;11:e80555. doi: 10.7554/eLife.80555 (PMC9665852; doi:10.7554/eLife.80555)
Supplement: Figure 1—source data 3. [file elife-80555-fig1-data3.xlsx]

## Sheet: Sheet1
wild type	egl-20(n585)
113.473	85.573
117.737	60.179
104.071	99.458
104.3	100.388
114.364	101.544
108.181	105.899
114.361	92.921
105.499	103.911
105.426	107.03
101.51	71.746
104.382	80.197
108.815	92.324
110.691	95.939
117.971	131.539
115.409	99.315
101.194	72.522
116.192	100.165
112.517	91.355
96.037	117.544
103.122	89.893
108.002	108.317
99.723	97.472
111.885	91.559
110.197	95.261
107.516	78.334
96.534	114.595
104.789
97.973
125.161
113.319
