# Supplementary material for: Channel-independent function of UNC-9/Innexin in spatial arrangement of GABAergic synapses in C. elegans
Source: eLife. 2022 Nov 15;11:e80555. doi: 10.7554/eLife.80555 (PMC9665852; doi:10.7554/eLife.80555)
Supplement: Figure 1—source data 4. [file elife-80555-fig1-data4.xlsx]

## Sheet: Sheet1
wild type	egl-20(n585)
8.074	35.548
7.595	61.704
11.115	30.384
9.651	24.997
5.303	31.131
5.181	5.322
15.575	35.04
4.845	37.43
10.577	9.085
8.503	43.156
7.021	42.396
7.354	79.437
12.746	43.615
9.825	62.802
6.612	36.664
6.412	81.29
7.04	55.496
4.405	13.509
1.899	41.58
9.664	46.415
8.083	46.037
12.423	15.899
2.554	30.191
11.186	54.898
13.91	56.662
12.102	39.009
9.637	19.87
7.437
11.588
5.98
