# Supplementary material for: Channel-independent function of UNC-9/Innexin in spatial arrangement of GABAergic synapses in C. elegans
Source: eLife. 2022 Nov 15;11:e80555. doi: 10.7554/eLife.80555 (PMC9665852; doi:10.7554/eLife.80555)
Supplement: Figure 2—figure supplement 4—source data 1. [file elife-80555-fig2-figsupp4-data1.xlsx]

## Sheet: Sheet1
wild type	egl-20(n585)	egl-20(n585); unc-9(e101)	egl-20(n585); unc-9(e101); Ex[Phsp::unc-9] #1	egl-20(n585); unc-9(e101); Ex[Phsp::unc-9] #2
2.101	1.219	5.024	4.798	8.132
0	0	6.35	3.894	9.112
0.407	7.5	7.085	0	10.335
1.932	5.95	2.815	0	1.35
0	1.037	6.235	5.91	8.301
0	1.376	0	18.535	19.704
1.755	1.842	8.634	11.772	0
3.675	5.02	4.483	49.826	16.363
0	0	4.435	23.461	25.843
6.742	0	2.251	10.567	7.085
7.058	1.759	7.732	21.816	10.031
2.782	4.28	4.569	6.337	7.528
0	0	2.575	16.979	1.681
3.023	0	7.554	6.33	0
1.328	4.019	7.059	25.532	48.749
0	2.399	0.467	13.994	8.866
5.045	4.872	0	24.127	0.609
0	5.925	0	20.338	7.218
0	0	9.124	7.334	17.799
8.299	0	1.575	12.075	18.859
0	0	8.854	14.534	18.627
3.184	8.022	6.756	32.474	19.224
2.744	2.512	12.344	22.499	6.409
2.314	2.393	6.775	27.586	4.613
0	2.032	5.75	8.368	12.907
1.314	3.519	4.553	33.013	29.177
0	2.817	2.023		18.472
1.628	0	0		2.759
		2.3		5.786
		23.284		14.206
		5.054		3.441
		4.317		10.242
				7.307
				0
