# Supplementary material for: Channel-independent function of UNC-9/Innexin in spatial arrangement of GABAergic synapses in C. elegans
Source: eLife. 2022 Nov 15;11:e80555. doi: 10.7554/eLife.80555 (PMC9665852; doi:10.7554/eLife.80555)
Supplement: Figure 2—figure supplement 6—source data 1. [file elife-80555-fig2-figsupp6-data1.xlsx]

## Sheet: Sheet1
wild type	egl-20(n585)	unc-104(e1256)	nlr-1(gk366849)	zoo-1(tm4133)
1.1487e+06	793482	527171	646388	1.27382e+06
751650	690113	545576	1.14808e+06	1.39382e+06
671710	526192	659699	975085	1.41005e+06
921983	610997	557905	846398	996977
906008	506280	517093	680850	1.73861e+06
829869	634503	548467	1.26138e+06	1.79001e+06
1.05179e+06	753772	1.19902e+06	913646	1.32879e+06
1.17439e+06	531058	645904	1.04385e+06	607617
963903	593691	948432	1.16891e+06	1.23258e+06
1.23021e+06	818847	1.14199e+06	1.23793e+06	1.11466e+06
1.44153e+06	740810	458912	1.13803e+06	1.17567e+06
1.11654e+06	406674	748866	882475	1.0706e+06
1.16004e+06	714245	426951	1.33746e+06	780889
1.45102e+06	392460	475744	688100	1.40665e+06
1.94008e+06	975683	800823	1.11611e+06	807873
1.85506e+06	695675	1.50093e+06	911512	994713
518922	882229	835470	1.1291e+06	917506
928911	521810	1.00128e+06	1.32554e+06	1.67427e+06
768790	702514	773559	1.30317e+06	1.2502e+06
807572	646212	706998	1.69089e+06	1.33546e+06
583589		287601	1.30272e+06	740027
819768		289248	1.32194e+06
891515			1.2858e+06
716007			1.46712e+06
868076			1.61218e+06
			1.06884e+06
			495948
