# Supplementary material for: Channel-independent function of UNC-9/Innexin in spatial arrangement of GABAergic synapses in C. elegans
Source: eLife. 2022 Nov 15;11:e80555. doi: 10.7554/eLife.80555 (PMC9665852; doi:10.7554/eLife.80555)
Supplement: Figure 2—source data 1. [file elife-80555-fig2-data1.xlsx]

## Sheet: Sheet1
wild type	unc-9(e101)	egl-20(n585)	egl-20(n585); inx-1(miz280)	egl-20(n585); inx-2(miz282)	egl-20(n585); inx-10(miz284)	egl-20(n585); inx-14(ok3267)	egl-20(n585); unc-7(e5)	egl-20(n585); unc-9(tm5479)	egl-20(n585); unc-9(e101)	egl-20(n585); unc-9(e101); Ex[Pegl-20::egl-20]
2.101	0.93	8.821	4.873	0	9.771	2.778	1.667	25.852	0	0
0	4.311	8.161	7.211	0	0	20.726	10.301	7.748	9.764	0
0.407	1.251	8.346	10.365	2.703	0	9.16	15.575	45.813	29.976	3.821
1.932	1.452	8.766	0	8.711	0	6.255	2.037	19.419	29.975	0
0	1.047	15.924	6.285	4.729	7.933	5.352	6.868	10.423	9.523	0
0	2.778	6.619	4.845	11.158	12.805	22.007	20.511	12.989	26.231	3.965
1.755	0.892	0	9.336	9.034	7.918	3.772	9.491	27.45	12.857	3.996
3.675	0.925	3.781	16.61	18.217	0	10.794	11.953	5.994	7.892	1.655
0	0	14.685	0	4.049	10.8	0	9.101	20.028	13.522	5.315
6.742	2.685	3.152	10.967	0	13.321	6.159	13.565	12.148	26.101	0
7.058	0	0	13.865	0	0	0	28.226	0	17.733	0
2.782	0	7.151	0	5.319	0	15.41	13.051	26.162	13.578	0
0	1.9	13.5	0	9.056	1.665	4.491	10.032	21.013	9.627	0
3.023	1.863	7.013	0.634	3.075	13.488	5.8	2.07	8.604	0	0
1.328	2.543	4.151	2.934	0	2.755	2.863	3.167	18.204	10.612	0
0	1.615	12.02	10.35	7.681	1.913	3.606	0	12.375	20.368	2.006
5.045	2.443	7.862	0	0	0	4.146	19.271	13.7	4.8	6.028
0	5.2	0	7.527	2.753	0	0	7.467	31.731	3.281	0
0	2.299	0	6.569	3.011	7.317	6.543	6.113	39.258	6.923	0
8.299		0	2.483	12.923	15.726	10.966	11.626	8.333	13.353	0
0		1.878	4.91	4.525	6.803	20.756		1.734	6.698	0
3.184		0	0	11.137	2.937	6.883		24.886	4.144	0
2.744		0	5.02	2.151	2.255	17.047		2.202	33.206	2.39
2.314		0.904	5.102	2.972	15.105	14.33		7.018	27.449	0
0		0	8.774	1.851	14.976	1.522		15.592	3.897	0
1.314		2.025	8.423	1.59	3.023			0	2.905	6.659
0		15.746		3.519	5.826			24.024	14.729	0
1.628		4.008		2.833	8.606			20.399	40.4	9.891
		17.504		6.667	17.585			23.36	13.997	0
		3.272		8.319				30.17	39.531	6.196
		6.203		1.572					20.784	6.676
		5.844		1.173						0
		0								0
		2.101								0
		4.527
