# Supplementary material for: Channel-independent function of UNC-9/Innexin in spatial arrangement of GABAergic synapses in C. elegans
Source: eLife. 2022 Nov 15;11:e80555. doi: 10.7554/eLife.80555 (PMC9665852; doi:10.7554/eLife.80555)
Supplement: Figure 3—source data 1. [file elife-80555-fig3-data1.xlsx]

## Sheet: Sheet1
wildtype	egl-20(n585)	egl-20(n585); unc-9(e101)	egl-20(n585); unc-9(e101); Ex[neuronal::unc-9]	egl-20(n585); unc-9(e101); Ex[DDs::unc-9]	egl-20(n585); unc-9(e101); Ex[DD6::unc-9]	egl-20(n585); unc-9(e101); Ex[muscle::unc-9]
2.101	8.821	0	2.21	9.336	4.624	16.057
0	8.161	9.764	2.308	9.157	8.355	5.161
0.407	8.346	29.976	4.468	0	18.119	14.242
1.932	8.766	29.975	0	2.109	1.982	10.205
0	15.924	9.523	21.498	2.475	7.992	19.903
0	6.619	26.231	1.914	9.698	11.933	15.039
1.755	0	12.857	6.37	12.964	21.583	18.843
3.675	3.781	7.892	3.91	0	10.305	13.28
0	14.685	13.522	4.062	10.01	42.366	11.726
6.742	3.152	26.101	7.626	5.631	14.8	14.232
7.058	0	17.733	1.136	20.729	12.261	4.905
2.782	7.151	13.578	5.109	11.27	15.384	17.526
0	13.5	9.627	2.068	15.098	4.256	24.957
3.023	7.013	0	4.596	20.55	1.559	7.436
1.328	4.151	10.612	3.506	1.1941	12.766	29.433
0	12.02	20.368	4.226	1.064	3.955	8.702
5.045	7.862	4.8	8.22	13.539	10.099	0
0	0	3.281	13	23.507	14.413	46.716
0	0	6.923	7.72	11.994	16.893	17.442
8.299	0	13.353	2.235	5.19	13.589	1.859
0	1.878	6.698	12.22	16.134	0	5.203
3.184	0	4.144	8.174	4.791	5.774	12.858
2.744	0	33.206	4.987	21.724	15.007	8.104
2.314	0.904	27.449	0	7.784	16.49	9.934
0	0	3.897	11.66	10.7	31.105	25.723
1.314	2.025	2.905	6.064	0	14.233	13.325
0	15.746	14.729	4.956	2.818	0	0
1.628	4.008	40.4	7.617	8.152	13.712	20.881
	17.504	13.997	7.702	8.25	35.238	25.149
	3.272	39.531	13.846	0	10.988	0
	6.203	20.784	0.517			38.598
	5.844		10.791			0
	0		8.779			0
	2.101		0			24.411
	4.527		18.87			20.868
			4.309			0
			6.48
			23.319
