# Supplementary material for: Channel-independent function of UNC-9/Innexin in spatial arrangement of GABAergic synapses in C. elegans
Source: eLife. 2022 Nov 15;11:e80555. doi: 10.7554/eLife.80555 (PMC9665852; doi:10.7554/eLife.80555)
Supplement: Figure 4—source data 1. [file elife-80555-fig4-data1.xlsx]

## Sheet: Sheet1
wild type	egl-20(n585)	egl-20(n585); unc-1(e719)	egl-20(n585) unc-24(miz225)	egl-20(n585) unc-24(miz226); unc-1(e719)
2.101	8.821	9.789	6.077	5.444
0	8.161	4.719	0	0
0.407	8.346	0	12.701	11.158
1.932	8.766	0	6.623	4.278
0	15.924	20.531	2.598	9.302
0	6.619	8.208	0	13.849
1.755	0	8.366	11.007	0
3.675	3.781	2.74	7.853	15.035
0	14.685	2.491	10.655	19.35
6.742	3.152	0	0	0
7.058	0	5.06	21.123	3.826
2.782	7.151	0	11.556	15.305
0	13.5	4.671	7.408	5.538
3.023	7.013	9.833	6.092	1.567
1.328	4.151	8.843	0	12.783
0	12.02	0	2.886	14.273
5.045	7.862	6.52	0	0
0	0	9.083	9.714	12.845
0	0	8.549	8.069	17.152
8.299	0	7.794	13.584	7.071
0	1.878	5.648	23.087	10.757
3.184	0	0.91	21.498	0
2.744	0	2.832	0	0
2.314	0.904	1.676	8.917	3.18
0	0	16.96	5.645	14.779
1.314	2.025		0	0
0	15.746		6.088	13
1.628	4.008		0	14.668
	17.504		4.506	21.142
	3.272		8.507	8.073
	6.203		0	12.528
	5.844			1.402
	0			0
	2.101			0
	4.527			10.486
