# Supplementary material for: Channel-independent function of UNC-9/Innexin in spatial arrangement of GABAergic synapses in C. elegans
Source: eLife. 2022 Nov 15;11:e80555. doi: 10.7554/eLife.80555 (PMC9665852; doi:10.7554/eLife.80555)
Supplement: Figure 5—source data 1. [file elife-80555-fig5-data1.xlsx]

## Sheet: Sheet1
wildtype	egl-20(n585)	egl-20(n585); unc-9(miz81; unc-9::7×gfp11)	egl-20(n585); unc-9(syb3236; ΔN18)	egl-20(n585); unc-1(miz297) unc-9(syb3236; ΔN18)	egl-20(n585); unc-9(e101)	egl-20(n585); unc-9(e101); Ex[neuronal::unc-9(ΔN18)]	egl-20(n585); unc-9(e101); Ex[DDs::unc-9(ΔN18)]	egl-20(n585); unc-9(e101); Ex[neuronal::unc-9::mTagBFP2]
2.101	8.821	18.36	2.937	0	0	2.609	7.442	15.454
0	8.161	11.073	3.9	2.381	9.764	7.905	3.911	4.178
0.407	8.346	0	6.754	7.697	29.976	7.465	15.206	10.244
1.932	8.766	13.606	0.923	0	29.975	11.291	0	2.621
0	15.924	22.35	8.177	0.839	9.523	5.368	6.582	8.697
0	6.619	1.309	3.423	9.333	26.231	7.091	10.65	18.39
1.755	0	0	11.177	5.031	12.857	7.985	4.071	0
3.675	3.781	3.898	0	2.225	7.892	0	19.148	4.816
0	14.685	3.272	0	2.776	13.522	13.283	4.282	10.74
6.742	3.152	0	0.608	3.486	26.101	8.694	1.641	12.041
7.058	0	12.525	6.299	3.832	17.733	6.236	3.854	8.225
2.782	7.151	3.192	17.701	5.408	13.578	6.537	5.534	1.178
0	13.5	4.842	0.873	12.369	9.627	17.431	11.598	8.205
3.023	7.013	8.733	6.119	8.116	0	9.055	6.189	18.64
1.328	4.151	5.896	1.214	20.942	10.612	14.997	13.13	20.686
0	12.02	4.395	6.235	8.998	20.368	13.61	31.016	1.54
5.045	7.862	8.851	3.028	5.467	4.8	13.428	6.452	4.994
0	0	9.842	11.057	6.777	3.281	0	2.823	3.238
0	0	7.404	14.908	19.733	6.923	12.947	13.777	11.235
8.299	0	6.898	5.352	6.716	13.353	3.289	4.497	2.359
0	1.878	14.438	7.848	15.557	6.698	4.83	17.087	7.439
3.184	0	4.219	5.763	25.326	4.144	0	10.915	11.174
2.744	0	8.974	6.628	2.976	33.206	0	8.741	0
2.314	0.904	5.164	9.486	0	27.449	15.58	0	27.365
0	0	9.931	17.919	0	3.897	24.052	12.43	0
1.314	2.025	6.214	11.581	3.072	2.905	7.894	13.544	15.332
0	15.746	7.61	2.555	14.248	14.729	11.729	10.517	16.198
1.628	4.008	9.938	2.693	10.313	40.4	0	8.152	1.805
	17.504	5.688	2.597	14.002	13.997	0	8.25	17.971
	3.272	6.7	0	22.678	39.531	5.414	0	0
	6.203	5.957	8.333	11.352	20.784	8.203		4.296
	5.844	6.145	6.057	22.031		0		9.23
	0		3.185	14.139		8.511
	2.101			24.112		9.422
	4.527					19.928
						6.611
						5.789
						23.319
