# Supplementary material for: Channel-independent function of UNC-9/Innexin in spatial arrangement of GABAergic synapses in C. elegans
Source: eLife. 2022 Nov 15;11:e80555. doi: 10.7554/eLife.80555 (PMC9665852; doi:10.7554/eLife.80555)
Supplement: Figure 5—source data 2. [file elife-80555-fig5-data2.xlsx]

## Sheet: Sheet1
Group	unc-9(e101)		UNC-9		UNC-9D18		UNC-9::BFP		UNC-9::GFP		wt
V_step(mV)	mean	SE	mean	SE	mean	SE	mean	SE	mean	SE	mean	SE
-80	-4.31144	0.74322	-86.136	1.86382	-7.91371	0.8474	-442.653	20.8363	-4446.31	41.867	-40.2838	4.24248
-70	-3.76741	0.47768	-83.7228	1.04291	-6.87188	0.65963	-387.284	18.7931	-4006.98	40.8663	-36.8756	3.7181
-60	-2.9334	0.51035	-78.6055	2.10466	-5.60468	0.44083	-331.707	16.6581	-3511.97	40.4864	-37.8964	2.47153
-50	-2.9854	0.45332	-76.0439	1.66918	-4.96133	0.41767	-275.459	14.3598	-2977.33	36.1628	-35.8091	1.77751
-40	-2.9128	0.46037	-69.0536	0.53445	-4.23404	0.33599	-220.75	11.9307	-2408.25	27.8706	-32.0172	1.37054
-30	-2.09136	0.55637	-55.3053	0.93339	-3.09335	0.47198	-167.492	8.83007	-1826.02	18.9359	-27.458	1.28674
-20	-1.25431	0.69627	-39.1462	0.46128	-2.05028	0.3737	-109.958	6.08013	-1228.15	12.2787	-20.4541	0.90774
-10	-0.44709	0.49991	-19.1538	0.4594	-1.0598	0.15617	-56.4096	3.48451	-625.535	6.59852	-11.5785	0.91257
10	1.05215	0.77171	19.1998	0.22435	1.16514	0.2308	55.413	3.51322	596.466	6.92619	8.35722	1.06377
20	0.41442	0.82584	38.6807	0.53042	1.68449	0.44459	109.106	6.77834	1214.58	10.713	18.654	1.05576
30	0.60215	0.45357	56.4138	0.99731	3.31918	0.31122	164.333	10.7313	1826.87	16.4133	28.1219	1.49419
40	0.89858	0.53853	70.8126	1.64873	3.61548	0.41035	220.884	14.3127	2451.22	23.884	37.2179	1.68166
50	1.14942	0.45295	82.607	2.08354	4.81585	0.41525	277.377	17.907	3074.16	24.6358	39.0071	2.47022
60	1.74835	0.43612	85.9633	1.77642	3.75448	0.53373	336.619	21.9402	3698.27	33.1772	46.6219	2.41415
70	1.4085	0.58079	89.5583	2.43331	4.48443	0.81811	395.519	25.6983	4320.3	41.0129	46.4986	3.05727
80	1.68798	0.44755	92.627	2.35254	3.35031	0.66029	457.994	29.7549	4939.19	48.3342	51.5266	3.66441
