# Supplementary material for: Channel-independent function of UNC-9/Innexin in spatial arrangement of GABAergic synapses in C. elegans
Source: eLife. 2022 Nov 15;11:e80555. doi: 10.7554/eLife.80555 (PMC9665852; doi:10.7554/eLife.80555)
Supplement: Figure 5—source data 3. [file elife-80555-fig5-data3.xlsx]

## Sheet: Sheet1
Group	wt	e101	UNC-9	UNC-9DN18	UNC-9BFP
mean	0.638524	0.07795	1.0726	0.0820533	5.5811
SE	0.0137528	0.00826273	0.0857566	0.00755318	0.316871
1	0.62309	0.05123	1.26139	0.0766	5.65151
2	0.66054	0.08453	1.2243	0.068	5.68033
3	0.62101	0.1125	1.03107	0.0726	5.00855
4	0.58832	0.075	1.04316	0.07535	5.10397
5	0.63166	0.05624	1.35477	0.08099	4.43563
6	0.62382	0.123	0.88578	0.11878	6.21743
7	0.60729	0.0456	0.70776		6.97028
8	0.69032	0.0895
9	0.60787	0.0567
10	0.73132	0.0852
